# Supplementary material for: Tautomeric transition between wobble A·C DNA base mispair and Watson–Crick-like A·C* mismatch: microstructural mechanism and biological significance
Source: Royal Society of Chemistry journal article supplement (doi:10.1039/c5cp01568e), 2015-01-01
Supplement: c5cp01568e1.pdf [file c5cp01568e1.pdf]

## Electronic Supplementary Information (ESI) for:

### **Tautomeric transition between wobble A·C DNA base mispair and Watson-Crick-like A·C\* mismatch: microstructural mechanism and biological significance**

OI'ha O. Brovarets' & Dmytro M. Hovorun✉

Department of Molecular and Quantum Biophysics, Institute of Molecular Biology and Genetics, National Academy of Sciences of Ukraine, 150 Akademika Zabolotnoho Str., 03680 Kyiv, Ukraine

Department of Molecular Biotechnology and Bioinformatics, Institute of High Technologies, Taras Shevchenko National University of Kyiv, 2-h Akademika Hlushkova Ave., 03022 Kyiv, Ukraine

✉Corresponding author. E-mail: dhovorun@imbg.org.ua

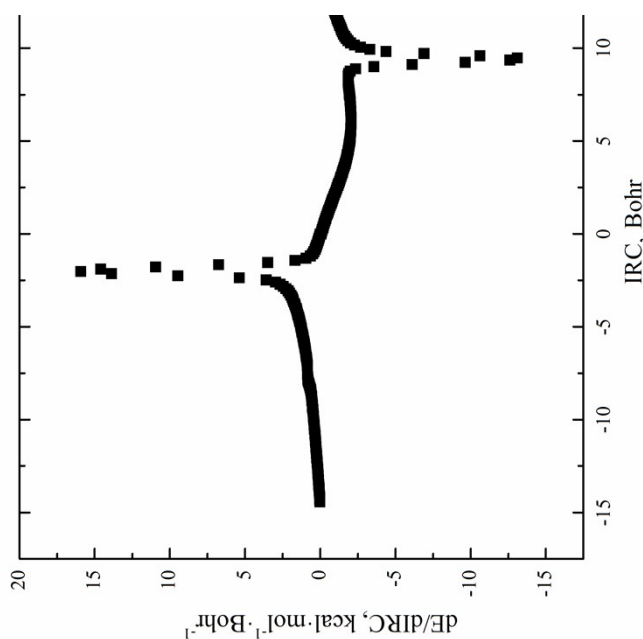

**Fig. S1.** Profile of the first derivative of the electronic energy with respect to the IRC ( $dE/dIRC$ ) along the IRC of the A·C(w) ↔ A·C\*(WC) tautomerisation *via* the sequential DPT obtained at the B3LYP/6-311++G(d,p) level of theory.

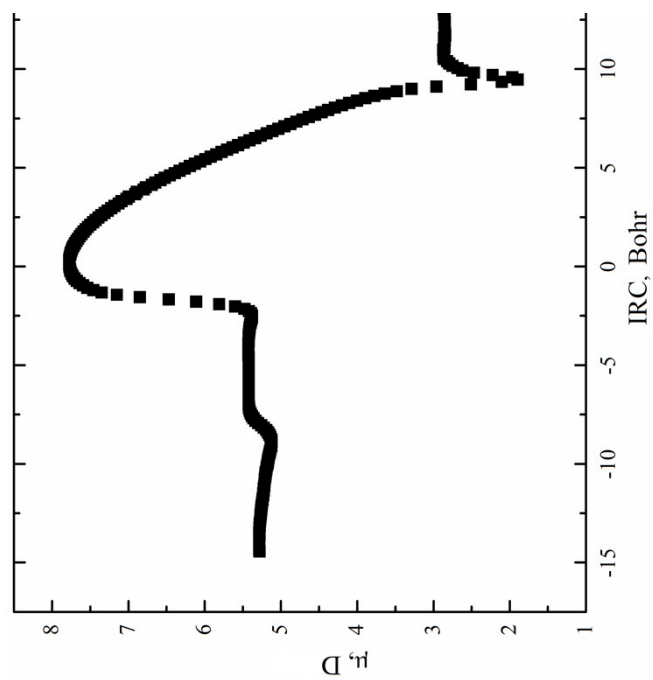

**Fig. S2.** Profile of the dipole moment  $\mu$  along the IRC of the  $A \cdot C(w) \leftrightarrow A \cdot C^*(WC)$  tautomerisation *via* the sequential DPT obtained at the B3LYP/6-311++G(d,p) level of theory.

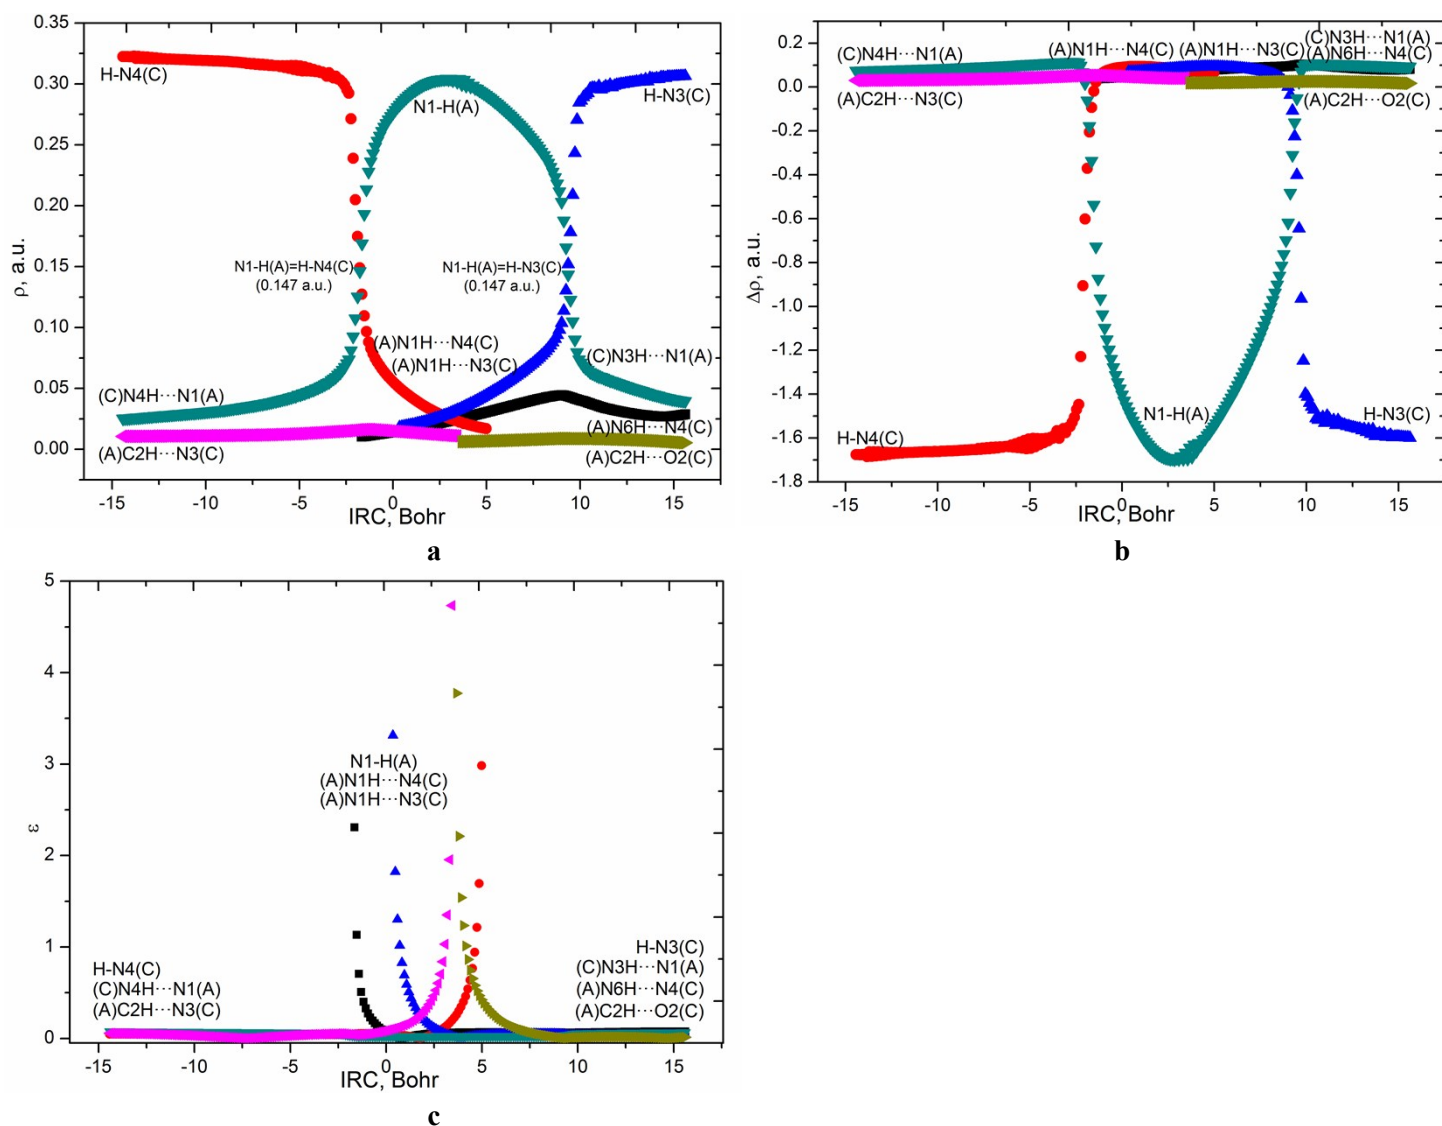

**Fig. S3.** Profiles of: **(a)** the electron density  $\rho$ ; **(b)** the Laplacian of the electron density  $\Delta\rho$  and **(c)** the ellipticity  $\epsilon$  at the (3,-1) BCPs of the covalent and hydrogen bonds along the IRC of the A·C(w) $\leftrightarrow$ A·C\*(WC) tautomerisation *via* the sequential DPT obtained at the B3LYP/6-311++G(d,p) level of theory (see also Scheme 1, Fig. 3 and Tables 1, 4).

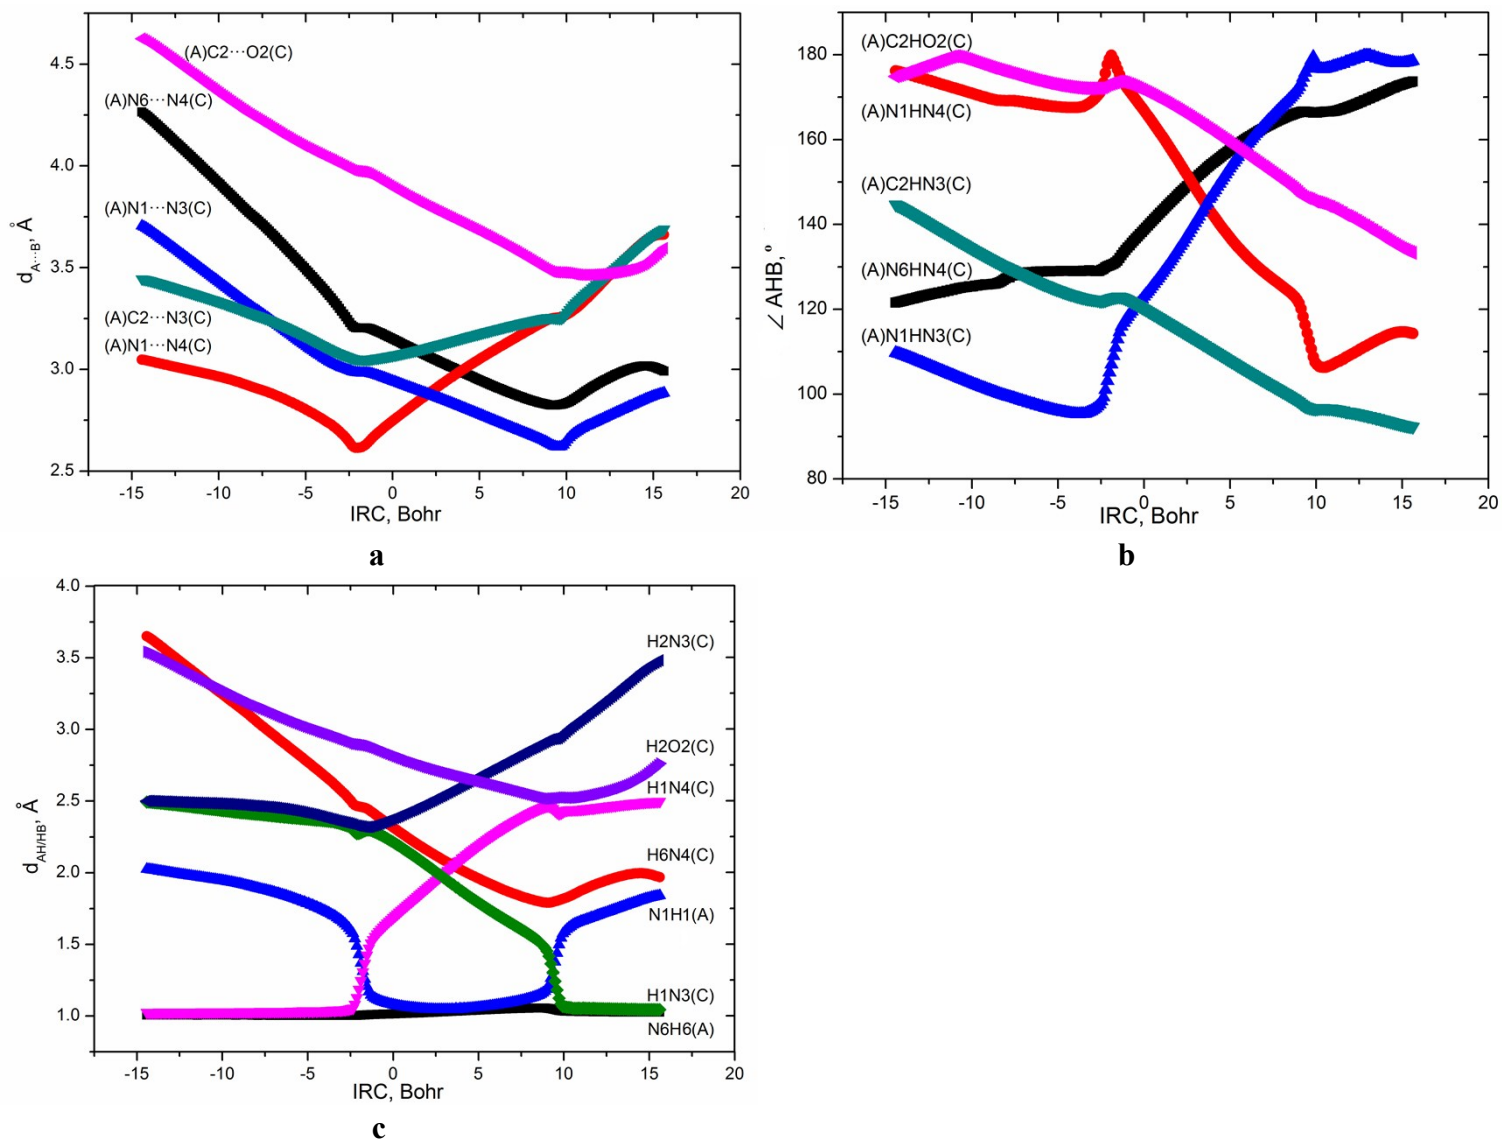

**Fig. S4.** Profiles of: **(a)** the distance  $d_{A...B}$  between the electronegative A and B atoms; **(b)** the distance  $d_{AH/ HB}$  between the hydrogen and electronegative A or B atoms and **(c)** the angle  $\angle AHB$  along the IRC of the  $A\cdot C(w) \leftrightarrow A\cdot C^*(WC)$  tautomerisation *via* the sequential DPT obtained at the B3LYP/6-311++G(d,p) level of theory (see also Scheme 1, Fig. 3 and Tables 1, 4).
